# Supplementary material
Source: publisher figshare collection journal article supplement (https://acs.figshare.com/ndownloader/files/5116063)
Supplement: Supplementary file 1 [file 5116063]

  
data_part1 
  
_audit_creation_method            SHELXL-97 
_chemical_name_systematic 
; 
 ? 
; 
_chemical_name_common             ? 
_chemical_melting_point           ? 
_chemical_formula_moiety          ? 
_chemical_formula_sum 
 'C18 H20 N2 O S' 
_chemical_formula_weight          312.42 
  
loop_ 
 _atom_type_symbol 
 _atom_type_description 
 _atom_type_scat_dispersion_real 
 _atom_type_scat_dispersion_imag 
 _atom_type_scat_source 
 'C'  'C'   0.0033   0.0016 
 'International Tables Vol C Tables 4.2.6.8 and 6.1.1.4' 
 'H'  'H'   0.0000   0.0000 
 'International Tables Vol C Tables 4.2.6.8 and 6.1.1.4' 
 'N'  'N'   0.0061   0.0033 
 'International Tables Vol C Tables 4.2.6.8 and 6.1.1.4' 
 'O'  'O'   0.0106   0.0060 
 'International Tables Vol C Tables 4.2.6.8 and 6.1.1.4' 
 'S'  'S'   0.1246   0.1234 
 'International Tables Vol C Tables 4.2.6.8 and 6.1.1.4' 
  
_symmetry_cell_setting            monoclinic 
_symmetry_space_group_name_H-M    'P 21' 
  
loop_ 
 _symmetry_equiv_pos_as_xyz 
 'x, y, z' 
 '-x, y+1/2, -z' 
  
_cell_length_a                    7.3906(5) 
_cell_length_b                    12.5141(9) 
_cell_length_c                    18.0913(12) 
_cell_angle_alpha                 90.00 
_cell_angle_beta                  98.244(2) 
_cell_angle_gamma                 90.00 
_cell_volume                      1655.9(2) 
_cell_formula_units_Z             4 
_cell_measurement_temperature     120(2) 
_cell_measurement_reflns_used     3784 
_cell_measurement_theta_min       2.72 
_cell_measurement_theta_max       25.73 
  
_exptl_crystal_description        block 
_exptl_crystal_colour             colourless 
_exptl_crystal_size_max           0.12 
_exptl_crystal_size_mid           0.08 
_exptl_crystal_size_min           0.08 
_exptl_crystal_density_meas       ? 
_exptl_crystal_density_diffrn     1.253 
_exptl_crystal_density_method     'not measured' 
_exptl_crystal_F_000              664 
_exptl_absorpt_coefficient_mu     0.199 
_exptl_absorpt_correction_type    multi-scan 
_exptl_absorpt_correction_T_min   0.715 
_exptl_absorpt_correction_T_max   1.000
_exptl_absorpt_process_details    'Bruker SADABS' 
  
_exptl_special_details 
; 
 ? 
; 
  
_diffrn_ambient_temperature       120(2) 
_diffrn_radiation_wavelength      0.67710 
_diffrn_radiation_type            synchrotron 
_diffrn_radiation_source          'Daresbury SRS station 9.8'
_diffrn_radiation_monochromator   'silicon 111'
_diffrn_measurement_device_type   'Bruker SMART APEX2 CCD diffractometer' 
_diffrn_measurement_method        'fine-slice \w scans' 
_diffrn_detector_area_resol_mean  ? 
_diffrn_standards_number          0 
_diffrn_standards_interval_count  ? 
_diffrn_standards_interval_time   ? 
_diffrn_standards_decay_%         5 
_diffrn_reflns_number             11926 
_diffrn_reflns_av_R_equivalents   0.0240 
_diffrn_reflns_av_sigmaI/netI     0.0328 
_diffrn_reflns_limit_h_min        -8 
_diffrn_reflns_limit_h_max        8 
_diffrn_reflns_limit_k_min        -14 
_diffrn_reflns_limit_k_max        14 
_diffrn_reflns_limit_l_min        -21 
_diffrn_reflns_limit_l_max        21 
_diffrn_reflns_theta_min          2.72 
_diffrn_reflns_theta_max          23.47 
_reflns_number_total              5508 
_reflns_number_gt                 4072 
_reflns_threshold_expression      >2\s(I) 
  
_computing_data_collection        'Bruker APEX2' 
_computing_cell_refinement        'Bruker SAINT' 
_computing_data_reduction         'Bruker SAINT' 
_computing_structure_solution     'SHELXS-97 (Sheldrick, 1990)' 
_computing_structure_refinement   'SHELXL-97 (Sheldrick, 1997)' 
_computing_molecular_graphics     ? 
_computing_publication_material   ? 
  
_refine_special_details 
; 
Disorder present in one ethyl group, modelled over two half occupied
sites with isotropic adps. Also the  heterocycle in the other
independent molecule shows some disorder with the two N atoms, C1a
and S14a modelled over two sites with occupancies 0.8 and 0.2. Only
the major S sites was modelled with anistropic adps. Suitable geometry
restraints were applied.
; 
  
_refine_ls_structure_factor_coef  Fsqd 
_refine_ls_matrix_type            full 
_refine_ls_weighting_scheme       calc 
_refine_ls_weighting_details 
 'calc w=1/[\s^2^(Fo^2^)+(0.1626P)^2^+0.2320P] where P=(Fo^2^+2Fc^2^)/3' 
_atom_sites_solution_primary      direct 
_atom_sites_solution_secondary    difmap 
_atom_sites_solution_hydrogens    geom 
_refine_ls_hydrogen_treatment     constr
_refine_ls_extinction_method      SHELXL 
_refine_ls_extinction_coef        0.13(6) 
_refine_ls_extinction_expression 
 'Fc^*^=kFc[1+0.001xFc^2^\l^3^/sin(2\q)]^-1/4^' 
_refine_ls_abs_structure_details 
 'Flack H D (1983), Acta Cryst. A39, 876-881' 
_refine_ls_abs_structure_Flack    0.12(16) 
_chemical_absolute_configuration  ad
_refine_ls_number_reflns          5508 
_refine_ls_number_parameters      398 
_refine_ls_number_restraints      167 
_refine_ls_R_factor_all           0.1046 
_refine_ls_R_factor_gt            0.0866 
_refine_ls_wR_factor_ref          0.2556 
_refine_ls_wR_factor_gt           0.2357 
_refine_ls_goodness_of_fit_ref    1.096 
_refine_ls_restrained_S_all       1.217 
_refine_ls_shift/su_max           0.005 
_refine_ls_shift/su_mean          0.001 
  
loop_ 
 _atom_site_label 
 _atom_site_type_symbol 
 _atom_site_fract_x 
 _atom_site_fract_y 
 _atom_site_fract_z 
 _atom_site_U_iso_or_equiv 
 _atom_site_adp_type 
 _atom_site_occupancy 
 _atom_site_symmetry_multiplicity 
 _atom_site_calc_flag 
 _atom_site_refinement_flags 
 _atom_site_disorder_assembly 
 _atom_site_disorder_group 
C1 C 0.7099(7) 0.0719(5) 0.1943(3) 0.0911(15) Uani 1 1 d DU . . 
N2 N 0.7860(8) -0.0133(4) 0.1618(2) 0.1072(16) Uani 1 1 d DU B . 
H2A H 0.8895 -0.0407 0.1800 0.129 Uiso 1 1 calc R . . 
C3 C 0.6794(10) -0.0522(6) 0.0955(4) 0.113(2) Uani 1 1 d DU . . 
H3A H 0.6371 -0.1256 0.1009 0.136 Uiso 0.50 1 calc PR A 1 
H3' H 0.6201 -0.1144 0.1145 0.136 Uiso 0.50 1 calc PR A 2 
C4 C 0.5173(9) 0.0307(6) 0.0843(3) 0.0987(16) Uani 1 1 d DU B . 
H4A H 0.4028 -0.0075 0.0874 0.118 Uiso 1 1 calc R . . 
N5 N 0.5550(7) 0.0996(4) 0.1477(2) 0.0981(14) Uani 1 1 d DU B . 
C6 C 0.5005(9) 0.0872(6) 0.0110(3) 0.0987(16) Uani 1 1 d U . . 
C7 C 0.3676(10) 0.0575(8) -0.0488(3) 0.118(2) Uani 1 1 d U B . 
H7A H 0.2823 0.0046 -0.0430 0.141 Uiso 1 1 calc R . . 
C8 C 0.3663(11) 0.1104(11) -0.1189(4) 0.138(3) Uani 1 1 d U . . 
H8A H 0.2750 0.0939 -0.1582 0.166 Uiso 1 1 calc R B . 
C9 C 0.4965(14) 0.1852(10) -0.1298(4) 0.143(3) Uani 1 1 d U B . 
H9A H 0.4993 0.2156 -0.1766 0.172 Uiso 1 1 calc R . . 
C10 C 0.6211(12) 0.2132(8) -0.0702(4) 0.126(2) Uani 1 1 d U . . 
H10B H 0.7081 0.2647 -0.0765 0.151 Uiso 1 1 calc R B . 
C11 C 0.6228(10) 0.1692(6) -0.0025(4) 0.1045(18) Uani 1 1 d U B . 
H11B H 0.7075 0.1935 0.0370 0.125 Uiso 1 1 calc R . . 
C12 C 0.8287(18) -0.0429(11) 0.0345(8) 0.100(3) Uiso 0.50 1 d PDU B 1 
H12C H 0.7630 -0.0363 -0.0157 0.120 Uiso 0.50 1 calc PR B 1 
H12D H 0.9033 0.0205 0.0452 0.120 Uiso 0.50 1 calc PR B 1 
C13 C 0.950(2) -0.1405(12) 0.0391(9) 0.116(4) Uiso 0.50 1 d PDU B 1 
H13D H 1.0324 -0.1350 0.0028 0.174 Uiso 0.50 1 calc PR B 1 
H13E H 0.8761 -0.2034 0.0293 0.174 Uiso 0.50 1 calc PR B 1 
H13F H 1.0191 -0.1453 0.0882 0.174 Uiso 0.50 1 calc PR B 1 
C12' C 0.7509(17) -0.0956(11) 0.0375(7) 0.096(3) Uiso 0.50 1 d PDU B 2 
H12A H 0.8142 -0.0396 0.0145 0.115 Uiso 0.50 1 calc PR B 2 
H12B H 0.6503 -0.1193 0.0007 0.115 Uiso 0.50 1 calc PR B 2 
C13' C 0.883(2) -0.1891(13) 0.0545(11) 0.131(5) Uiso 0.50 1 d PDU B 2 
H13G H 0.9213 -0.2137 0.0090 0.196 Uiso 0.50 1 calc PR B 2 
H13H H 0.8222 -0.2462 0.0767 0.196 Uiso 0.50 1 calc PR B 2 
H13I H 0.9872 -0.1663 0.0885 0.196 Uiso 0.50 1 calc PR B 2 
S14 S 0.7900(2) 0.12704(19) 0.27574(8) 0.1153(8) Uani 1 1 d U C 2 
C15 C 0.4407(9) 0.1867(6) 0.1592(3) 0.0991(16) Uani 1 1 d U B 2 
C16 C 0.4997(10) 0.2897(6) 0.1556(3) 0.0981(16) Uani 1 1 d U B 2 
H16B H 0.6201 0.3028 0.1488 0.118 Uiso 1 1 calc R B 2 
C17 C 0.3804(10) 0.3775(6) 0.1620(3) 0.1055(18) Uani 1 1 d U B 2 
H17B H 0.4219 0.4475 0.1611 0.127 Uiso 1 1 calc R B 2 
C18 C 0.2075(10) 0.3558(8) 0.1695(4) 0.1127(19) Uani 1 1 d U B 2 
C19 C 0.1440(11) 0.2596(10) 0.1726(4) 0.129(2) Uani 1 1 d U B 2 
H19B H 0.0218 0.2502 0.1781 0.154 Uiso 1 1 calc R B 2 
C20 C 0.2572(11) 0.1670(8) 0.1678(4) 0.120(2) Uani 1 1 d U B 2 
H20B H 0.2118 0.0980 0.1703 0.144 Uiso 1 1 calc R B 2 
O21 O 0.0776(8) 0.4359(6) 0.1750(3) 0.1358(18) Uani 1 1 d U B 2 
C22 C 0.1365(14) 0.5454(9) 0.1763(5) 0.144(3) Uani 1 1 d U B 2 
H22D H 0.0338 0.5914 0.1789 0.216 Uiso 1 1 calc R B 2 
H22E H 0.1881 0.5608 0.1317 0.216 Uiso 1 1 calc R B 2 
H22F H 0.2271 0.5571 0.2191 0.216 Uiso 1 1 calc R B 2 
C1A C 0.2317(8) 0.9005(5) 0.3167(3) 0.0708(14) Uiso 0.80 1 d PDU D 1 
N2A N 0.1203(11) 0.9616(6) 0.3552(3) 0.108(3) Uiso 0.80 1 d PDU D 1 
H2AA H 0.0404 1.0060 0.3341 0.130 Uiso 0.80 1 calc PR D 1 
C1B C 0.181(3) 0.8613(17) 0.3120(10) 0.091(8) Uiso 0.20 1 d PDU D 2 
N2B N 0.0933(19) 0.9312(12) 0.3568(5) 0.043(4) Uiso 0.20 1 d PDU D 2 
H2BA H 0.0012 0.9680 0.3363 0.051 Uiso 0.20 1 calc PR D 2 
C3A C 0.1526(10) 0.9428(6) 0.4350(3) 0.1057(17) Uani 1 1 d DU . . 
H3AA H 0.0387 0.9215 0.4527 0.127 Uiso 1 1 calc R D 1 
C4A C 0.2881(9) 0.8475(6) 0.4409(3) 0.0996(16) Uani 1 1 d DU D . 
H4AA H 0.2185 0.7807 0.4402 0.119 Uiso 1 1 calc R E 1 
N5A N 0.3668(11) 0.8561(6) 0.3703(3) 0.096(3) Uiso 0.80 1 d PDU D 1 
N5B N 0.326(3) 0.8323(18) 0.3673(6) 0.059(6) Uiso 0.20 1 d PDU D 2 
C6A C 0.4405(9) 0.8455(6) 0.5076(3) 0.1018(17) Uani 1 1 d U . . 
C7A C 0.5978(10) 0.9112(6) 0.5085(4) 0.1110(19) Uani 1 1 d U D . 
H7AA H 0.6114 0.9536 0.4674 0.133 Uiso 1 1 calc R . . 
C8A C 0.7294(11) 0.9117(8) 0.5703(4) 0.127(2) Uani 1 1 d U . . 
H8AA H 0.8314 0.9558 0.5724 0.153 Uiso 1 1 calc R D . 
C9A C 0.7075(12) 0.8468(9) 0.6279(4) 0.137(3) Uani 1 1 d U D . 
H9AA H 0.7998 0.8448 0.6686 0.164 Uiso 1 1 calc R . . 
C10A C 0.5614(10) 0.7857(9) 0.6297(4) 0.127(3) Uani 1 1 d U . . 
H10A H 0.5505 0.7452 0.6719 0.153 Uiso 1 1 calc R D . 
C11A C 0.4303(10) 0.7825(7) 0.5707(3) 0.1069(18) Uani 1 1 d U D . 
H11A H 0.3304 0.7376 0.5717 0.128 Uiso 1 1 calc R . . 
C12A C 0.2197(12) 1.0439(6) 0.4702(4) 0.117(2) Uani 1 1 d U D . 
H12E H 0.3185 1.0706 0.4454 0.140 Uiso 1 1 calc R . . 
H12F H 0.2688 1.0304 0.5220 0.140 Uiso 1 1 calc R . . 
C13A C 0.0673(12) 1.1314(7) 0.4669(4) 0.126(3) Uani 1 1 d U . . 
H13A H 0.1196 1.1966 0.4882 0.189 Uiso 1 1 calc R D . 
H13B H -0.0266 1.1076 0.4947 0.189 Uiso 1 1 calc R . . 
H13C H 0.0154 1.1435 0.4159 0.189 Uiso 1 1 calc R . . 
S14A S 0.2133(3) 0.8885(2) 0.22551(8) 0.1012(8) Uani 0.80 1 d PDU D 1 
S14B S 0.1413(13) 0.8345(8) 0.2328(6) 0.098(3) Uiso 0.20 1 d PDU D 2 
C15A C 0.4852(9) 0.7746(6) 0.3480(3) 0.0963(16) Uani 1 1 d U . . 
C16A C 0.4447(10) 0.6662(6) 0.3526(3) 0.1015(17) Uani 1 1 d U D . 
H16A H 0.3322 0.6452 0.3651 0.122 Uiso 1 1 calc R . . 
C17A C 0.5697(10) 0.5901(6) 0.3389(3) 0.1014(17) Uani 1 1 d U . . 
H17A H 0.5400 0.5182 0.3421 0.122 Uiso 1 1 calc R D . 
C18A C 0.7351(9) 0.6173(6) 0.3208(3) 0.0972(16) Uani 1 1 d U D . 
C19A C 0.7785(11) 0.7258(7) 0.3157(4) 0.1127(19) Uani 1 1 d U . . 
H19A H 0.8919 0.7456 0.3035 0.135 Uiso 1 1 calc R D . 
C20A C 0.6535(10) 0.8035(6) 0.3286(3) 0.1023(17) Uani 1 1 d U D . 
H20A H 0.6824 0.8754 0.3243 0.123 Uiso 1 1 calc R . . 
O21A O 0.8645(7) 0.5461(4) 0.3059(2) 0.1102(14) Uani 1 1 d U . . 
C22A C 0.8136(11) 0.4343(7) 0.3086(4) 0.116(2) Uani 1 1 d U D . 
H22A H 0.9146 0.3904 0.2993 0.174 Uiso 1 1 calc R . . 
H22B H 0.7104 0.4205 0.2712 0.174 Uiso 1 1 calc R . . 
H22C H 0.7822 0.4179 0.3570 0.174 Uiso 1 1 calc R . . 
  
loop_ 
 _atom_site_aniso_label 
 _atom_site_aniso_U_11 
 _atom_site_aniso_U_22 
 _atom_site_aniso_U_33 
 _atom_site_aniso_U_23 
 _atom_site_aniso_U_13 
 _atom_site_aniso_U_12 
C1 0.100(3) 0.126(4) 0.049(2) 0.011(2) 0.012(2) 0.004(3) 
N2 0.117(3) 0.147(4) 0.056(2) -0.004(2) 0.004(2) 0.027(3) 
C3 0.134(5) 0.112(4) 0.086(4) -0.017(3) -0.012(3) -0.002(4) 
C4 0.105(4) 0.127(4) 0.063(3) -0.006(3) 0.005(3) -0.015(3) 
N5 0.119(3) 0.120(3) 0.051(2) -0.006(2) -0.004(2) 0.007(3) 
C6 0.092(3) 0.144(5) 0.059(3) -0.008(3) 0.007(2) -0.002(3) 
C7 0.107(4) 0.190(7) 0.052(3) -0.007(3) -0.003(3) -0.008(4) 
C8 0.112(4) 0.231(9) 0.066(3) 0.001(5) -0.004(3) 0.011(5) 
C9 0.166(7) 0.199(8) 0.066(4) 0.006(5) 0.023(4) -0.005(6) 
C10 0.138(5) 0.159(6) 0.088(4) -0.010(4) 0.041(4) -0.026(5) 
C11 0.114(4) 0.129(5) 0.070(3) -0.009(3) 0.012(3) -0.007(4) 
S14 0.1062(11) 0.1851(18) 0.0509(8) -0.0193(9) -0.0014(6) 0.0395(11) 
C15 0.116(4) 0.138(4) 0.041(2) -0.001(3) 0.001(2) 0.013(3) 
C16 0.116(4) 0.124(4) 0.055(3) 0.012(3) 0.013(3) 0.011(3) 
C17 0.120(4) 0.142(5) 0.055(3) 0.026(3) 0.013(3) 0.019(4) 
C18 0.103(4) 0.171(5) 0.065(3) 0.015(4) 0.017(3) 0.003(4) 
C19 0.099(4) 0.198(6) 0.091(5) 0.004(5) 0.020(4) 0.001(4) 
C20 0.117(4) 0.163(6) 0.076(4) -0.012(4) 0.007(3) -0.024(4) 
O21 0.119(3) 0.198(5) 0.092(3) -0.001(4) 0.021(3) 0.028(4) 
C22 0.138(6) 0.189(6) 0.104(5) 0.030(6) 0.014(5) 0.052(6) 
C3A 0.127(4) 0.129(4) 0.061(3) -0.002(3) 0.012(3) -0.007(4) 
C4A 0.113(4) 0.121(4) 0.066(3) 0.000(3) 0.017(3) -0.010(3) 
C6A 0.117(4) 0.129(5) 0.057(3) -0.006(3) 0.009(3) 0.019(4) 
C7A 0.125(4) 0.136(5) 0.080(4) 0.002(3) 0.043(3) -0.003(4) 
C8A 0.118(5) 0.171(7) 0.096(5) -0.012(4) 0.023(4) -0.012(5) 
C9A 0.119(5) 0.234(10) 0.061(3) -0.007(4) 0.025(3) 0.001(5) 
C10A 0.114(5) 0.204(8) 0.066(3) 0.025(4) 0.022(3) 0.008(5) 
C11A 0.122(4) 0.148(5) 0.054(3) 0.003(3) 0.022(3) 0.004(4) 
C12A 0.140(5) 0.128(5) 0.070(3) -0.010(3) -0.024(3) 0.029(4) 
C13A 0.165(6) 0.127(5) 0.076(4) -0.021(4) -0.016(4) 0.032(5) 
S14A 0.1276(16) 0.1355(17) 0.0403(8) 0.0052(9) 0.0112(8) 0.0353(16) 
C15A 0.115(4) 0.117(4) 0.053(3) -0.006(3) -0.004(3) 0.028(3) 
C16A 0.109(4) 0.131(5) 0.064(3) -0.005(3) 0.011(3) 0.020(3) 
C17A 0.129(4) 0.117(4) 0.058(3) 0.001(3) 0.013(3) 0.028(3) 
C18A 0.119(4) 0.123(4) 0.049(2) -0.001(3) 0.013(3) 0.027(4) 
C19A 0.125(5) 0.146(5) 0.069(3) -0.019(3) 0.024(3) 0.004(4) 
C20A 0.136(5) 0.115(4) 0.054(3) -0.009(3) 0.008(3) 0.010(4) 
O21A 0.116(3) 0.141(3) 0.074(2) -0.010(2) 0.016(2) 0.032(3) 
C22A 0.120(5) 0.127(4) 0.098(5) -0.016(4) 0.006(4) 0.023(4) 
  
_geom_special_details 
; 
 All esds (except the esd in the dihedral angle between two l.s. planes) 
 are estimated using the full covariance matrix.  The cell esds are taken 
 into account individually in the estimation of esds in distances, angles 
 and torsion angles; correlations between esds in cell parameters are only 
 used when they are defined by crystal symmetry.  An approximate (isotropic) 
 treatment of cell esds is used for estimating esds involving l.s. planes. 
; 
  
loop_ 
 _geom_bond_atom_site_label_1 
 _geom_bond_atom_site_label_2 
 _geom_bond_distance 
 _geom_bond_site_symmetry_2 
 _geom_bond_publ_flag 
C1 N5 1.365(6) . ? 
C1 N2 1.376(6) . ? 
C1 S14 1.658(5) . ? 
N2 C3 1.423(6) . ? 
C3 C12' 1.354(14) . ? 
C3 C4 1.575(10) . ? 
C3 C12 1.672(16) . ? 
C4 N5 1.429(6) . ? 
C4 C6 1.493(9) . ? 
N5 C15 1.413(9) . ? 
C6 C7 1.404(9) . ? 
C6 C11 1.411(10) . ? 
C7 C8 1.430(11) . ? 
C8 C9 1.377(14) . ? 
C9 C10 1.360(12) . ? 
C10 C11 1.341(10) . ? 
C12 C13 1.511(15) . ? 
C12' C13' 1.525(16) . ? 
C15 C16 1.365(10) . ? 
C15 C20 1.409(10) . ? 
C16 C17 1.423(10) . ? 
C17 C18 1.332(11) . ? 
C18 C19 1.296(13) . ? 
C18 O21 1.401(10) . ? 
C19 C20 1.439(13) . ? 
O21 C22 1.437(13) . ? 
C1A N2A 1.383(6) . ? 
C1A N5A 1.402(6) . ? 
C1A S14A 1.643(6) . ? 
N2A C3A 1.447(7) . ? 
C1B N5B 1.408(9) . ? 
C1B N2B 1.410(9) . ? 
C1B S14B 1.46(2) . ? 
N2B C3A 1.427(8) . ? 
C3A C12A 1.470(10) . ? 
C3A C4A 1.552(9) . ? 
C4A N5B 1.413(8) . ? 
C4A N5A 1.481(7) . ? 
C4A C6A 1.529(9) . ? 
N5A C15A 1.439(9) . ? 
N5B C15A 1.462(17) . ? 
C6A C11A 1.399(9) . ? 
C6A C7A 1.422(10) . ? 
C7A C8A 1.373(11) . ? 
C8A C9A 1.350(12) . ? 
C9A C10A 1.327(12) . ? 
C10A C11A 1.335(10) . ? 
C12A C13A 1.566(11) . ? 
C15A C20A 1.388(10) . ? 
C15A C16A 1.394(11) . ? 
C16A C17A 1.374(9) . ? 
C17A C18A 1.353(10) . ? 
C18A O21A 1.362(8) . ? 
C18A C19A 1.401(11) . ? 
C19A C20A 1.385(10) . ? 
O21A C22A 1.452(10) . ? 
  
loop_ 
 _geom_angle_atom_site_label_1 
 _geom_angle_atom_site_label_2 
 _geom_angle_atom_site_label_3 
 _geom_angle 
 _geom_angle_site_symmetry_1 
 _geom_angle_site_symmetry_3 
 _geom_angle_publ_flag 
N5 C1 N2 106.9(4) . . ? 
N5 C1 S14 127.2(4) . . ? 
N2 C1 S14 125.9(4) . . ? 
C1 N2 C3 114.5(5) . . ? 
C12' C3 N2 124.1(8) . . ? 
C12' C3 C4 122.7(7) . . ? 
N2 C3 C4 101.6(5) . . ? 
C12' C3 C12 31.7(7) . . ? 
N2 C3 C12 101.2(7) . . ? 
C4 C3 C12 115.6(7) . . ? 
N5 C4 C6 114.1(6) . . ? 
N5 C4 C3 103.7(5) . . ? 
C6 C4 C3 112.9(5) . . ? 
C1 N5 C15 124.8(4) . . ? 
C1 N5 C4 113.1(5) . . ? 
C15 N5 C4 122.1(5) . . ? 
C7 C6 C11 117.0(6) . . ? 
C7 C6 C4 121.3(6) . . ? 
C11 C6 C4 121.6(6) . . ? 
C6 C7 C8 118.5(8) . . ? 
C9 C8 C7 121.7(7) . . ? 
C10 C9 C8 118.0(7) . . ? 
C11 C10 C9 122.4(8) . . ? 
C10 C11 C6 122.3(7) . . ? 
C13 C12 C3 110.5(11) . . ? 
C3 C12' C13' 117.4(12) . . ? 
C16 C15 C20 119.3(7) . . ? 
C16 C15 N5 121.3(6) . . ? 
C20 C15 N5 119.1(7) . . ? 
C15 C16 C17 121.2(6) . . ? 
C18 C17 C16 117.8(8) . . ? 
C19 C18 C17 123.5(9) . . ? 
C19 C18 O21 113.9(7) . . ? 
C17 C18 O21 122.6(8) . . ? 
C18 C19 C20 121.9(7) . . ? 
C15 C20 C19 116.3(8) . . ? 
C18 O21 C22 118.3(7) . . ? 
N2A C1A N5A 106.7(5) . . ? 
N2A C1A S14A 125.9(4) . . ? 
N5A C1A S14A 127.3(4) . . ? 
C1A N2A C3A 112.8(6) . . ? 
N5B C1B N2B 96.8(14) . . ? 
N5B C1B S14B 131.5(11) . . ? 
N2B C1B S14B 131.5(13) . . ? 
C1B N2B C3A 122.1(12) . . ? 
N2B C3A N2A 17.3(7) . . ? 
N2B C3A C12A 123.7(8) . . ? 
N2A C3A C12A 106.9(6) . . ? 
N2B C3A C4A 95.4(7) . . ? 
N2A C3A C4A 101.9(5) . . ? 
C12A C3A C4A 117.2(6) . . ? 
N5B C4A N5A 16.5(10) . . ? 
N5B C4A C6A 121.2(9) . . ? 
N5A C4A C6A 110.3(6) . . ? 
N5B C4A C3A 104.6(9) . . ? 
N5A C4A C3A 102.3(5) . . ? 
C6A C4A C3A 117.5(5) . . ? 
C1A N5A C15A 119.3(5) . . ? 
C1A N5A C4A 107.2(6) . . ? 
C15A N5A C4A 121.3(6) . . ? 
C1B N5B C4A 113.5(13) . . ? 
C1B N5B C15A 121.1(9) . . ? 
C4A N5B C15A 124.5(12) . . ? 
C11A C6A C7A 117.2(6) . . ? 
C11A C6A C4A 122.3(7) . . ? 
C7A C6A C4A 120.5(6) . . ? 
C8A C7A C6A 119.6(7) . . ? 
C9A C8A C7A 118.5(8) . . ? 
C10A C9A C8A 123.6(8) . . ? 
C9A C10A C11A 119.9(7) . . ? 
C10A C11A C6A 121.1(8) . . ? 
C3A C12A C13A 112.9(7) . . ? 
C20A C15A C16A 118.5(6) . . ? 
C20A C15A N5A 119.3(7) . . ? 
C16A C15A N5A 121.9(7) . . ? 
C20A C15A N5B 135.3(11) . . ? 
C16A C15A N5B 106.2(11) . . ? 
N5A C15A N5B 16.6(10) . . ? 
C17A C16A C15A 120.5(7) . . ? 
C18A C17A C16A 121.6(7) . . ? 
C17A C18A O21A 124.6(7) . . ? 
C17A C18A C19A 118.9(6) . . ? 
O21A C18A C19A 116.5(6) . . ? 
C20A C19A C18A 120.3(7) . . ? 
C19A C20A C15A 120.2(7) . . ? 
C18A O21A C22A 115.5(6) . . ? 
  
_diffrn_measured_fraction_theta_max    0.975 
_diffrn_reflns_theta_full              23.47 
_diffrn_measured_fraction_theta_full   0.975 
_refine_diff_density_max    0.387 
_refine_diff_density_min   -0.284 
_refine_diff_density_rms    0.045 
